# Supplementary material for: Identification of Raf-Like Kinases B Subfamily Genes in Gossypium Species Revealed GhRAF42 Enhanced Salt Tolerance in Cotton
Source: MDPI journal article supplement (doi:10.3390/ijms222312649), 2021-11-23
Supplement: s1 [file s1]

a

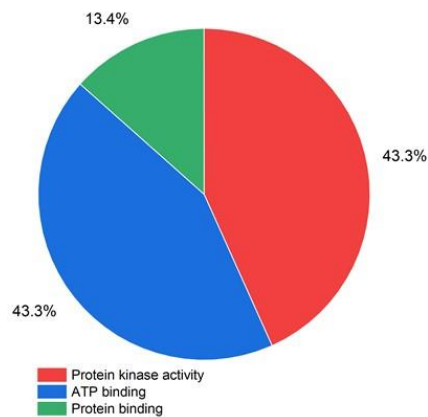

b

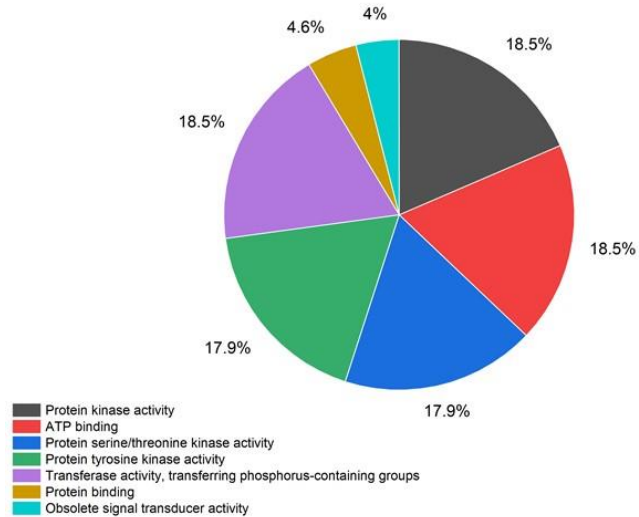

c

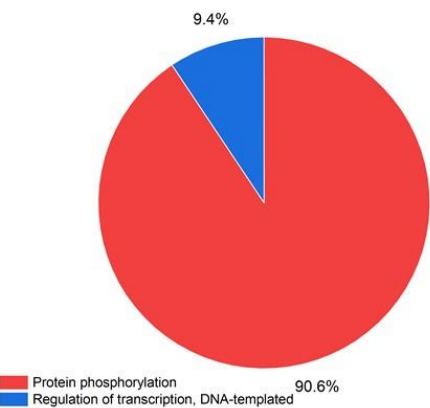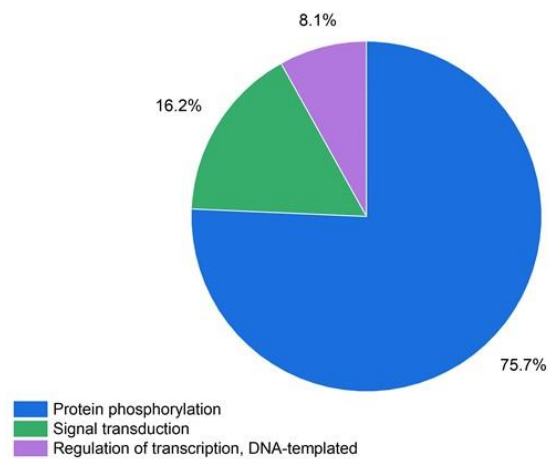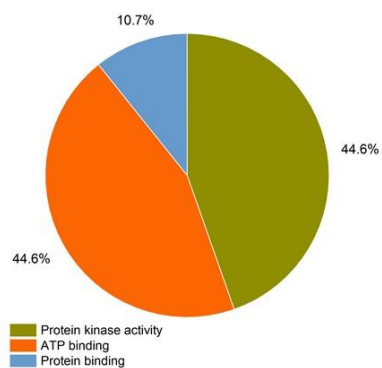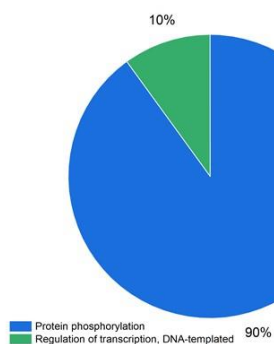

Figure S1. Analysis of RAF gene ontology to study molecular and biological functions (A) *G. arboreum* (B) *G. raimondii* (C) *G. barbadense*:

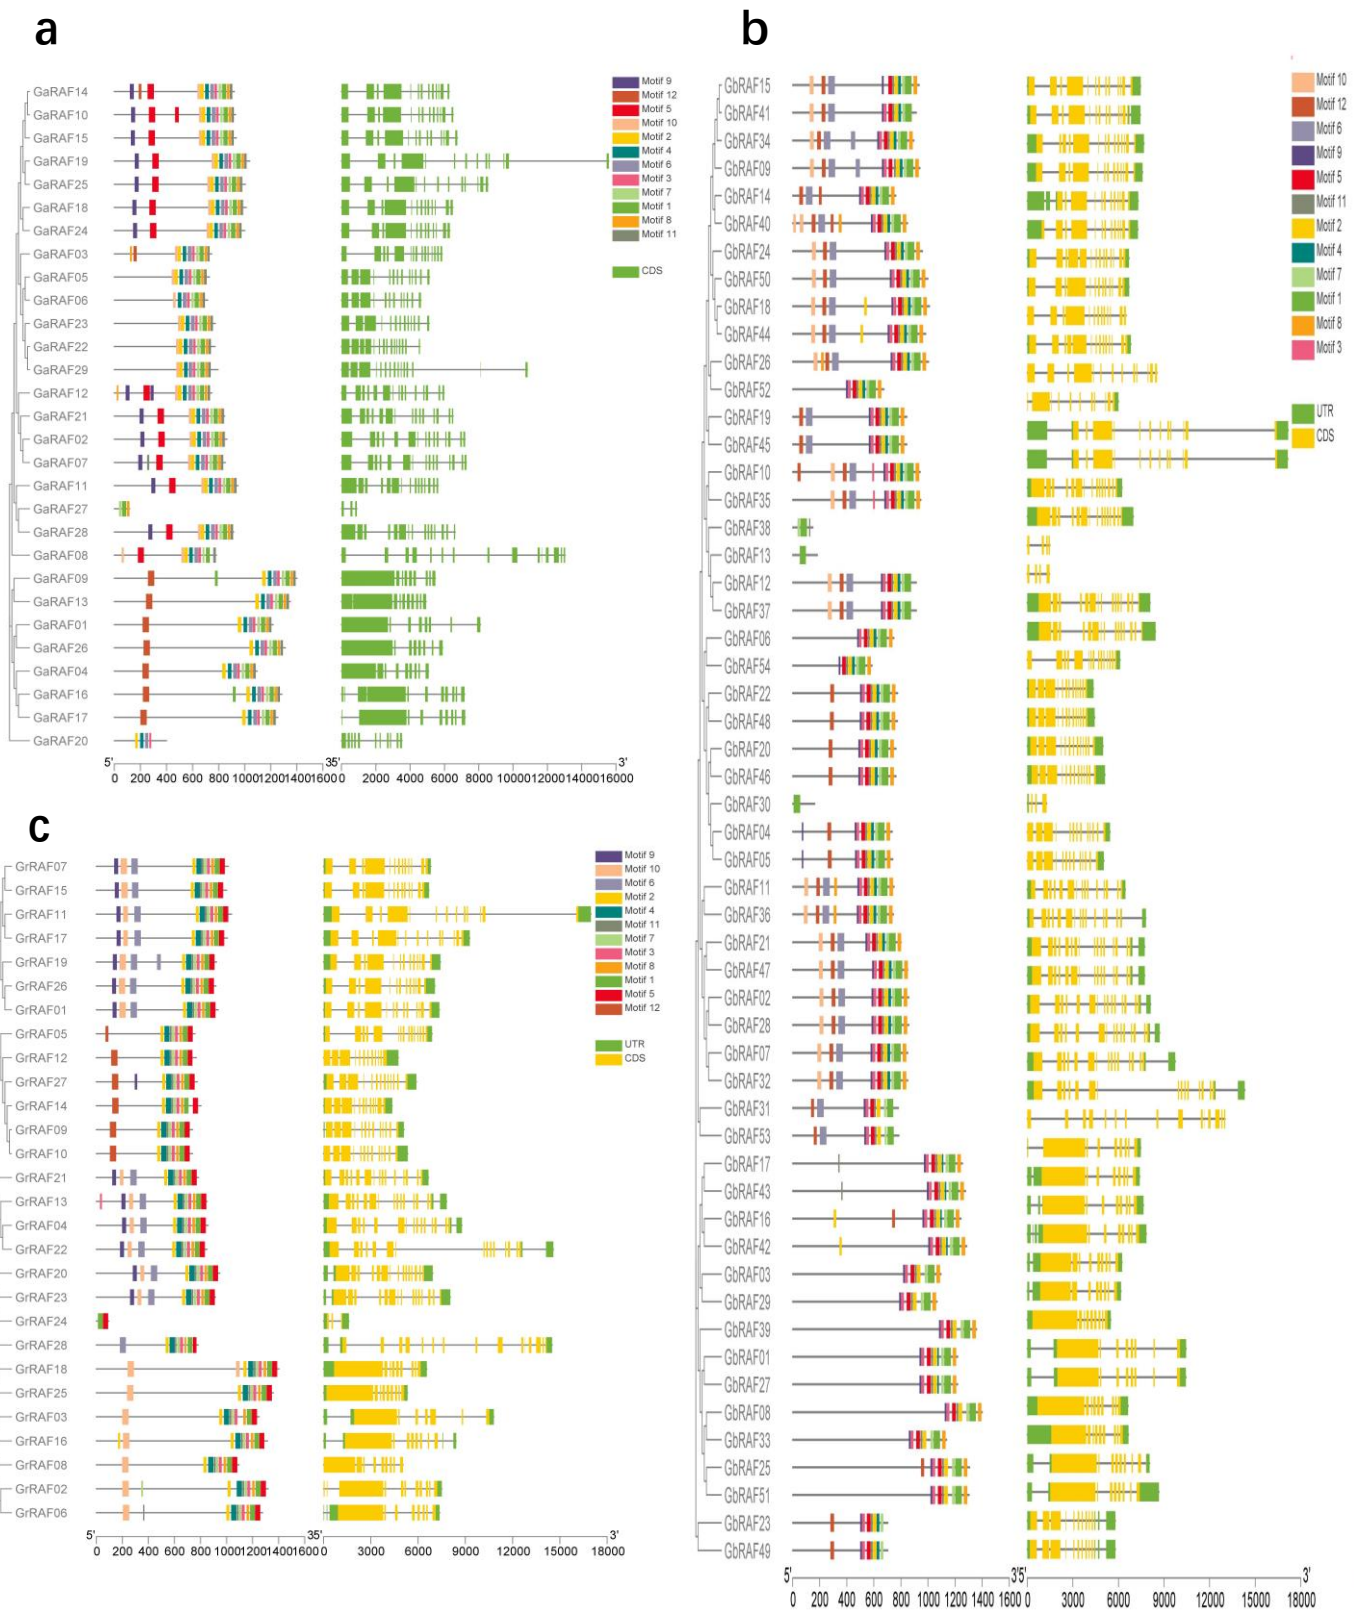

Figure S2: Phylogenetic tree, Motif and Gene structure of RAF gene Family of cotton (A) *G. arboreum* (b) *G. barbadense* (c) *G. raimondii*

**a**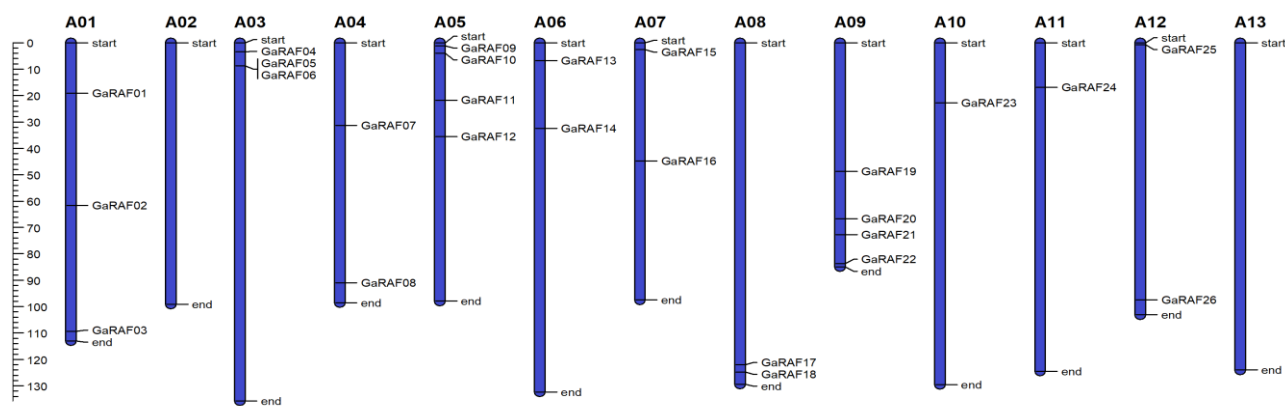**b**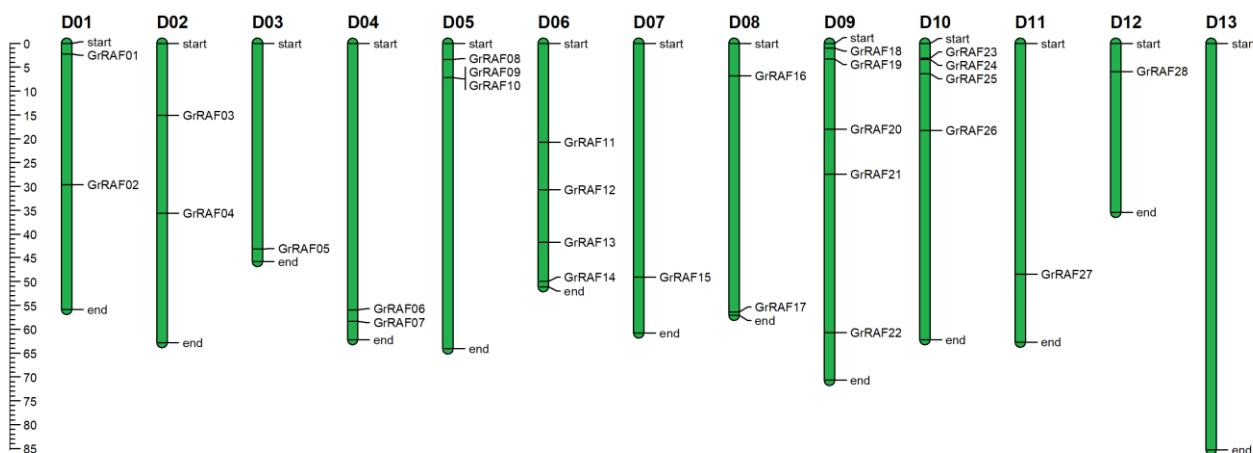**c**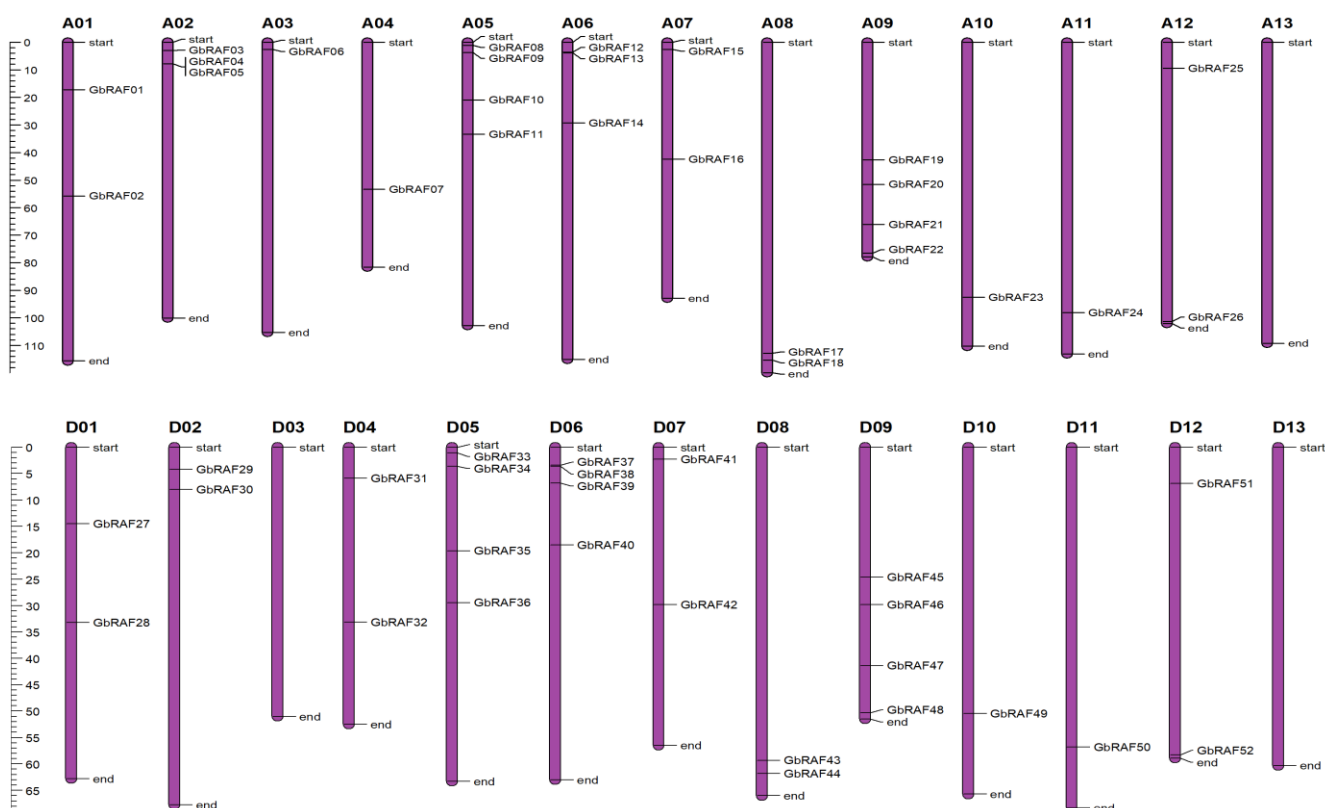

Figure S3. Chromosomal map of RAF gene family of cotton (A) *G. arboreum* (B) *G. raimondii* (c) *G. barbadense*

a

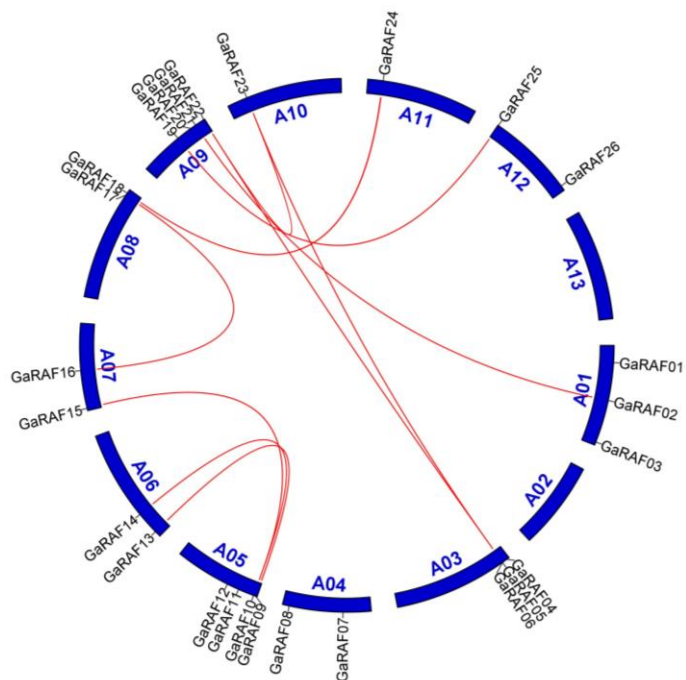

b

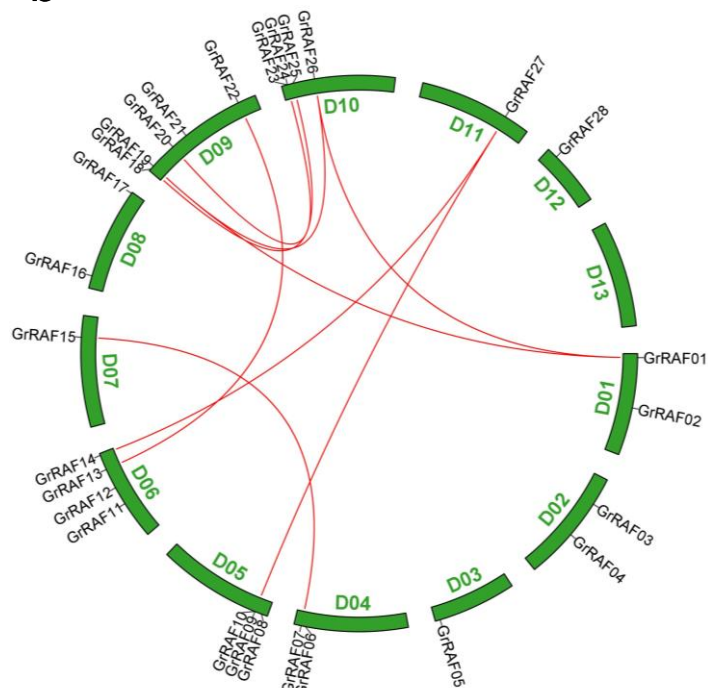

c

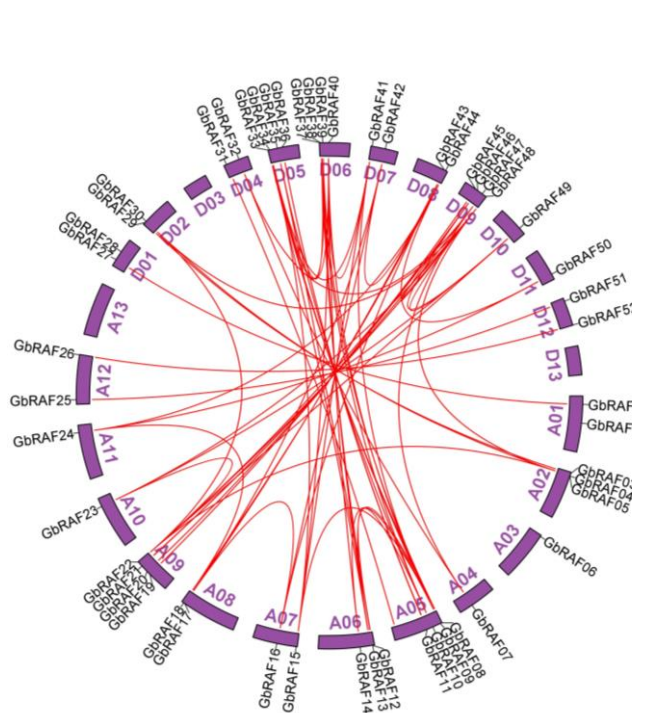

d

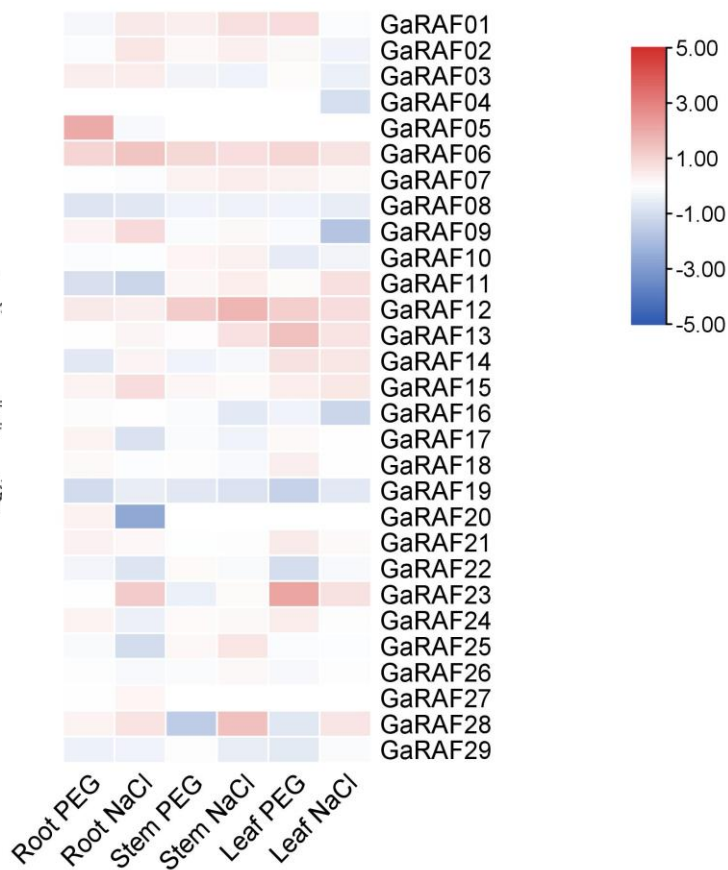

Figure S4: Collinearity and expression analysis of RAF gene family in cotton (a) *G. arboreum* (b) *G. raimondii* (c) *G. barbadense* (d) Expression analysis of *G. arboreum*



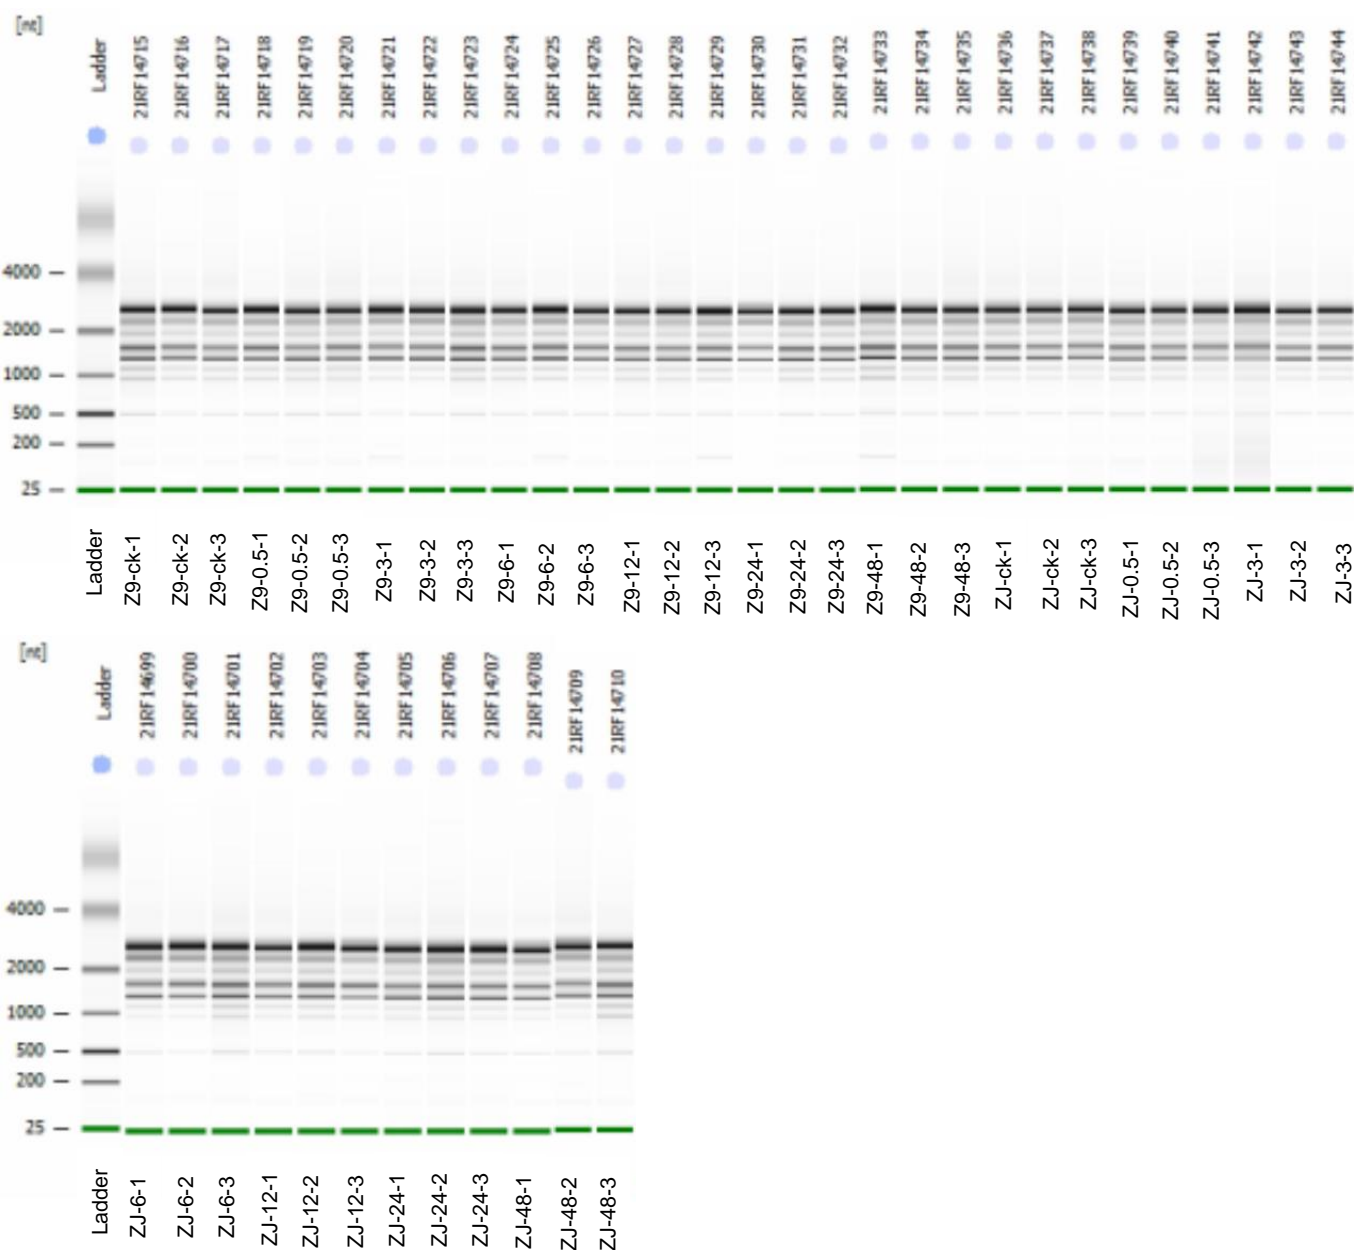

Figure S5: Analysis of the quantity, integrity and purity of total RNA for 42 leaf samples with the Agilent 2100 Bioanalyzer for qRT-PCR and RNA-seq. CK means NaCl-untreated as control.0.5h-48h means different time points after NaCl stress. Z9:Z9807;ZJ:ZJ0102.

a

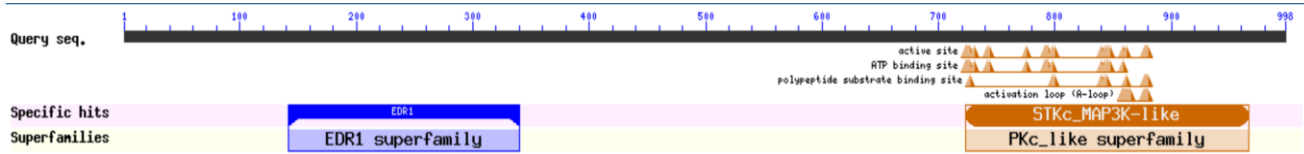

b

|             |                                             |     |
|-------------|---------------------------------------------|-----|
| AT1G08720.1 | POVLLFADVGE....CEIPWNDIV...IAERIGIGSYGEV    | 683 |
| GbRAF24     | HQLFDDVDVGE....CEIPWEDLD...ICERIGIGSYGEV    | 693 |
| GaRAF24     | HQLFDDVDVGE....CEIPWEDLD...ICERIGIGSYGEV    | 733 |
| GhRAF25     | HQLFDDVDVGE....CEIPWEDLD...ICERIGIGSYGEV    | 731 |
| GhRAF42     | HQLFDDVDVGE....CEIPWEDLD...ICERIGIGSYGEV    | 731 |
| GbRAF50     | HQLFDDVDVGE....CEIPWEDLD...ICERIGIGSYGEV    | 733 |
| GhRAF02     | HQLFDDVDVGE....CEIPWEDLD...ICERIGIGSYGEV    | 733 |
| GrRAF15     | HQLFDDVDVGE....CEIPWEDLD...ICERIGIGSYGEV    | 733 |
| GaRAF18     | EQLFDDVDVGE....CEIPWEDLD...ICERIGIGSYGEV    | 745 |
| GbRAF18     | EQLFDDVDVGE....CEIPWEDLD...ICERIGIGSYGEV    | 745 |
| GhRAF10     | EQLFDDVDVGE....CEIPWEDLD...ICERIGIGSYGEV    | 745 |
| GrRAF07     | EQLFDDVDVGE....CEIPWEDLD...ICERIGIGSYGEV    | 746 |
| GbRAF44     | EQLFDDVDVGE....CEIPWEDLD...ICERIGIGSYGEV    | 717 |
| GhRAF24     | EQLFDDVDVGE....CEIPWEDLD...ICERIGIGSYGEV    | 746 |
| AT5G49470.2 | NKVDMSDCLD...YEILWEDLT...ICEQIGGSGCGTV      | 502 |
| AT1G67890.1 | NKVDMSDCLD...YEILWEDLT...ICEQIGGSGCGTV      | 501 |
| AT3G06620.1 | NKVDTSSEGLE....YEILWEDLT...ICEQIGGSGCGTV    | 508 |
| Consensus   | d ei w dl i e g g s g v                     |     |
| AT1G08720.1 | RRLRHPNVVFLFMGAVTRPP...NLSIIITEFLP.....     | 747 |
| GbRAF24     | RRLRHPNVVFLFMGAVTRPP...NLSIIITEFLP.....     | 757 |
| GaRAF24     | RRLRHPNVVFLFMGAVTRPP...NLSIIITEFLP.....     | 797 |
| GhRAF25     | RRLRHPNVVFLFMGAVTRPP...NLSIIITEFLP.....     | 795 |
| GhRAF42     | RRLRHPNVVFLFMGAVTRPP...NLSIIITEFLP.....     | 795 |
| GbRAF50     | RRLRHPNVVFLFMGAVTRPP...NLSIIITEFLP.....     | 797 |
| GhRAF02     | RRLRHPNVVFLFMGAVTRPP...NLSIIITEFLP.....     | 797 |
| GrRAF15     | RRLRHPNVVFLFMGAVTRPP...NLSIIITEFLP.....     | 797 |
| GaRAF18     | RRLRHPNVVFLFMGAVTRPP...NLSIIITEFLP.....     | 809 |
| GbRAF18     | RRLRHPNVVFLFMGAVTRPP...NLSIIITEFLP.....     | 809 |
| GhRAF10     | RRLRHPNVVFLFMGAVTRPP...NLSIIITEFLP.....     | 809 |
| GrRAF07     | RRLRHPNVVFLFMGAVTRPP...NLSIIITEFLP.....     | 810 |
| GbRAF44     | RRLRHPNVVFLFMGAVTRPP...NLSIIITEFLP.....     | 781 |
| GhRAF24     | RRLRHPNVVFLFMGAVTRPP...NLSIIITEFLP.....     | 810 |
| AT5G49470.2 | KRLRHPNVLLFMGAVTSPQ...RLCIVTEFLP.....       | 566 |
| AT1G67890.1 | KRLRHPNVLLFMGAVTSPQ...RLCIVTEFLP.....       | 565 |
| AT3G06620.1 | KRLRHPNVLLFMGAVTSPQ...RLCIVSEFLP.....       | 572 |
| Consensus   | rlrhpnv f gav p l i eflp                    |     |
| AT1G08720.1 | ....RIKMALDVARGMNCNLTSTP...TIVHRDLKTFENLLVD | 801 |
| GbRAF24     | ....RIKMALDVARGMNCNLTSTP...TIVHRDLKTFENLLVD | 811 |
| GaRAF24     | ....RIKMALDVARGMNCNLTSTP...TIVHRDLKTFENLLVD | 851 |
| GhRAF25     | ....RIKMALDVARGMNCNLTSTP...TIVHRDLKTFENLLVD | 849 |
| GhRAF42     | ....RIKMALDVARGMNCNLTSTP...TIVHRDLKTFENLLVD | 849 |
| GbRAF50     | ....RIKMALDVARGMNCNLTSTP...TIVHRDLKTFENLLVD | 851 |
| GhRAF02     | ....RIKMALDVARGMNCNLTSTP...TIVHRDLKTFENLLVD | 851 |
| GrRAF15     | ....RIKMALDVARGMNCNLTSTP...TIVHRDLKTFENLLVD | 851 |
| GaRAF18     | ....RIKMALDVARGMNCNLTSTP...TIVHRDLKTFENLLVD | 863 |
| GbRAF18     | ....RIKMALDVARGMNCNLTSTP...TIVHRDLKTFENLLVD | 863 |
| GhRAF10     | ....RIKMALDVARGMNCNLTSTP...TIVHRDLKTFENLLVD | 863 |
| GrRAF07     | ....RIKMALDVARGMNCNLTSTP...TIVHRDLKTFENLLVD | 864 |
| GbRAF44     | ....RIKMALDVARGMNCNLTSTP...TIVHRDLKTFENLLVD | 835 |
| GhRAF24     | ....RIKMALDVARGMNCNLTSTP...TIVHRDLKTFENLLVD | 864 |
| AT5G49470.2 | MLHIFLTYYFAQARGMNYLHHCSP...PIIHRDLKSSNLLVD  | 684 |
| AT1G67890.1 | ....RIHMASDIARGMNYLHHCSP...PIIHRDLKSSNLLVD  | 619 |
| AT3G06620.1 | ....RIHMALDIARGMNYLHHCSP...PIIHRDLKSSNLLVD  | 626 |
| Consensus   | a gmn lh p i hrdlk nllvd                    |     |
| AT1G08720.1 | APEVLRNEP...SNEKCDVYSFGVILWEIATLRLPWSGMN    | 871 |
| GbRAF24     | APEVLRNEP...SNEKCDVYSFGVILWEIATLRLPWSGMN    | 881 |
| GaRAF24     | APEVLRNEP...SNEKCDVYSFGVILWEIATLRLPWSGMN    | 921 |
| GhRAF25     | APEVLRNEP...SNEKCDVYSFGVILWEIATLRLPWSGMN    | 919 |
| GhRAF42     | APEVLRNEP...SNEKCDVYSFGVILWEIATLRLPWSGMN    | 919 |
| GbRAF50     | APEVLRNEP...SNEKCDVYSFGVILWEIATLRLPWSGMN    | 921 |
| GhRAF02     | APEVLRNEP...SNEKCDVYSFGVILWEIATLRLPWSGMN    | 921 |
| GrRAF15     | APEVLRNEP...SNEKCDVYSFGVILWEIATLRLPWSGMN    | 921 |
| GaRAF18     | APEVLRNEP...SNEKCDVYSFGVILWEIATLRLPWSGMN    | 933 |
| GbRAF18     | APEVLRNEP...SNEKCDVYSFGVILWEIATLRLPWSGMN    | 933 |
| GhRAF10     | APEVLRNEP...SNEKCDVYSFGVILWEIATLRLPWSGMN    | 933 |
| GrRAF07     | APEVLRNEP...SNEKCDVYSFGVILWEIATLRLPWSGMN    | 934 |
| GbRAF44     | APEVLRNEP...SNEKCDVYSFGVILWEIATLRLPWSGMN    | 905 |
| GhRAF24     | APEVLRNEP...SNEKCDVYSFGVILWEIATLRLPWSGMN    | 934 |
| AT5G49470.2 | APEVLRNEA...ADEKSDVYSFGVILWEIATLRLPWESLN    | 754 |
| AT1G67890.1 | APEVLRNEA...ADEKSDVYSFGVILWEIATLRLPWENLN    | 688 |
| AT3G06620.1 | APEVLRNES...ADEKSDVYSFGVILWEIATLRLPWETLN    | 696 |
| Consensus   | apevlrne ek d ysfg lwe t pw n               |     |

Figure S6: *GhRAF* gene cloning, conserved domain database and sequence alignment analysis (A) Conserved domain database analysis of GhRAF42 (E) Multiple sequence alignment of GhRAF42
